# Supplementary material for: Highly selective colorimetric determination of catechol based on the aggregation-induced oxidase–mimic activity decrease of δ-MnO2
Source: Royal Society of Chemistry journal article supplement (doi:10.1039/c9ra10480a), 2020-01-01
Supplement: c9ra10480a1.pdf [file c9ra10480a1.pdf]

### Supporting information

## Highly selective colorimetric determination of catechol based on aggregation-induced oxidase-mimic activity decrease of $\delta$ -MnO<sub>2</sub>

Pengyu Xiao<sup>a</sup>, Yang Liu<sup>a</sup>, Wenjing Zong<sup>a</sup>, Jin Wang<sup>b,\*</sup>, Minghuo Wu<sup>a</sup>, Jingjing Zhan<sup>a</sup>, Xianliang Yi<sup>a</sup>, Lifen Liu<sup>a</sup>, Hao Zhou<sup>a,\*</sup>

<sup>a</sup>Key Laboratory of Industrial Ecology and Environmental Engineering (Ministry of Education), School of Ocean Science and Technology, Panjin Campus, Dalian University of Technology, 116023, China

<sup>b</sup>College of Agriculture and Biology, Shanghai Jiao Tong University, Shanghai, 200240, China

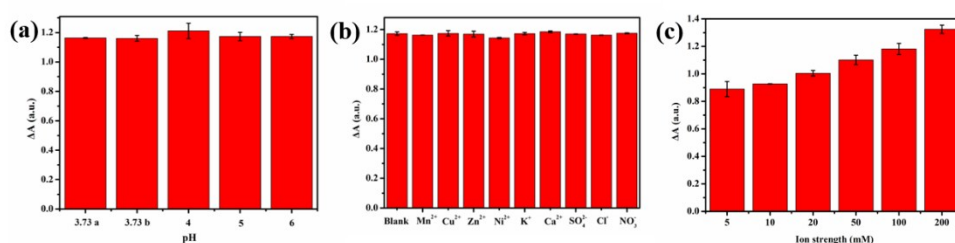

**Fig. S1.** The effects of (a) pH, (b) common cations and anions, and (c) ion strength during the incubation process of catechol and  $\delta$ -MnO<sub>2</sub> on the final TMB oxidase-like activity.

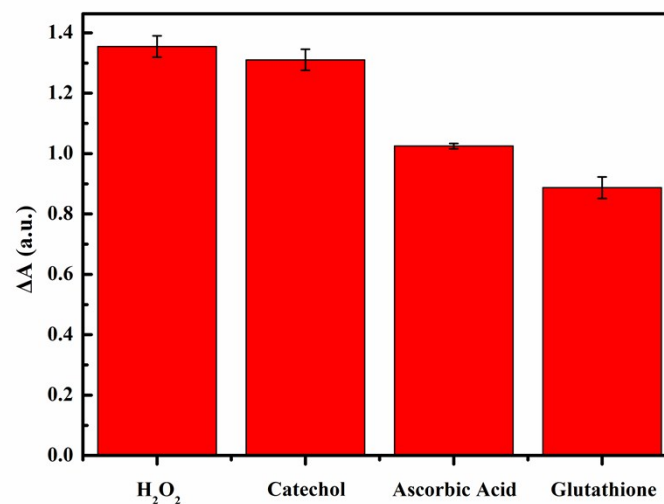

**Fig. S2.** The response of TMB- $\delta$ -MnO<sub>2</sub> to H<sub>2</sub>O<sub>2</sub>, glutathione, catechol and ascorbic acid.

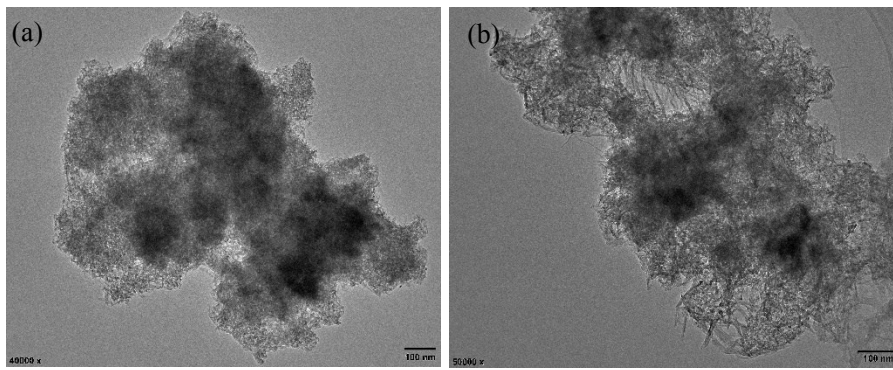

**Fig. S3.** TEM images of (a) pristine MnO<sub>2</sub> and (b) catechol reacted MnO<sub>2</sub>.
